# Supplementary material for: A Conserved Acidic Residue in the C-Terminal Flexible Loop of HIV-1 Nef Contributes to the Activity of SERINC5 and CD4 Downregulation
Source: MDPI journal article supplement (doi:10.3390/v15030652), 2023-02-28
Supplement: s1 [file s1]

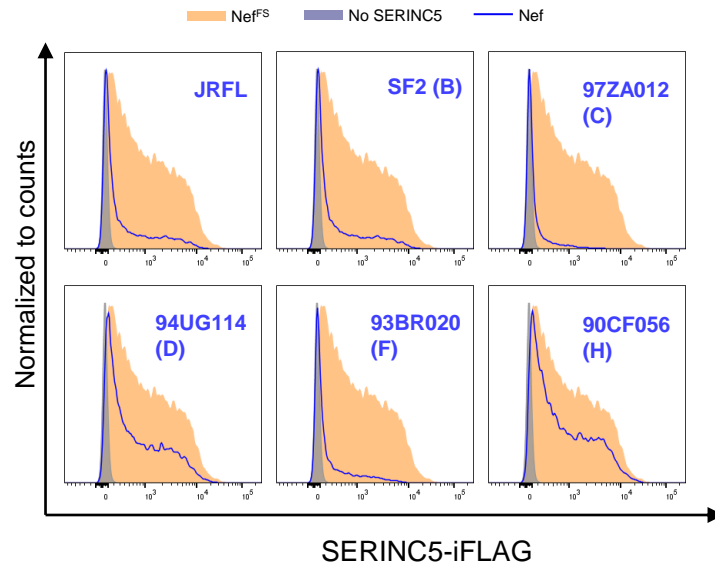

**Figure S1**

FACS plots measuring SERINC5-iFLAG cell surface levels in cells co-transfected with the indicated *nef* alleles expressed upstream of an IRES2-eGFP cassette to allow exclusive gating of Nef-expressing cells.

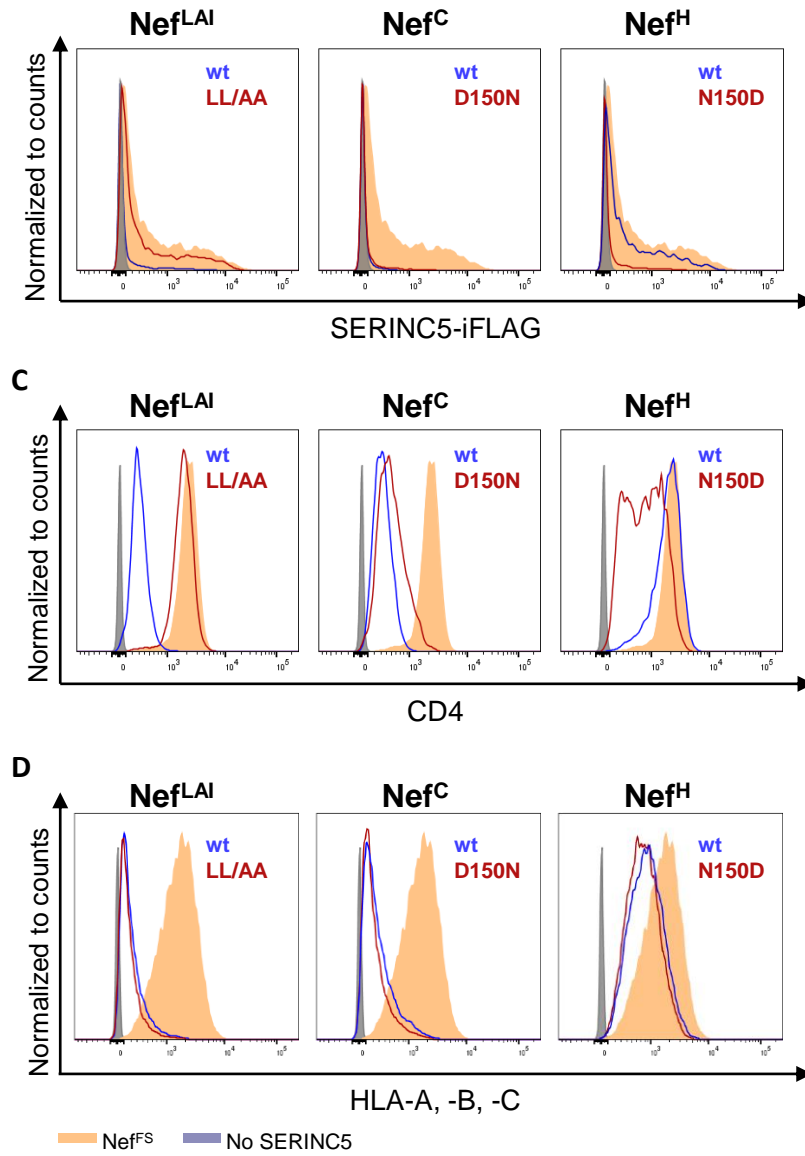

**Figure S2**

FACS plots measuring SERINC5-iFLAG (a), CD4 (b) and MHC-I (c) cell surface levels in cells expressing the indicated Nef molecules expressed upstream of an IRES2-eGFP cassette to allow exclusive gating of Nef-expressing cells. The well-characterized mutation of the dileucine sorting signal in the context of the Nef<sup>LAI</sup> protein was also tested as control.

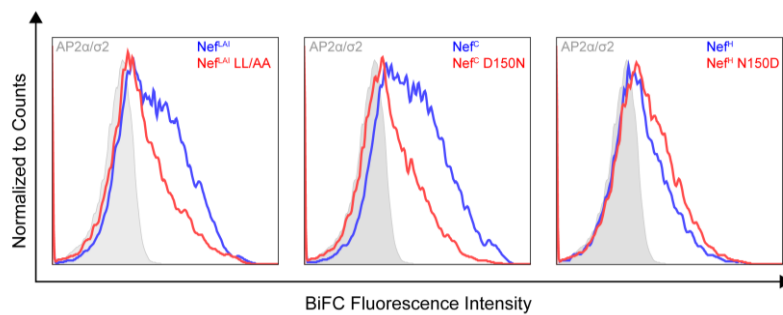

**Figure S3**

FACs plots measuring mean fluorescence intensity of BiFC signal in cells expressing indicated Nef proteins tagged with Venus N-HA and AP2 $\alpha$ / $\sigma$ 2 hemicomplex tagged with V5-Venus C-terminal fragment.
